# Supplementary material
Source: Springer Nature journal article supplement (https://www.springermedizin.de/resource/supplementary/12958_2010_756_MOESM7_ESM.pdf/9568410)

3 ————— Non linear IPG 3-10 —————> 10

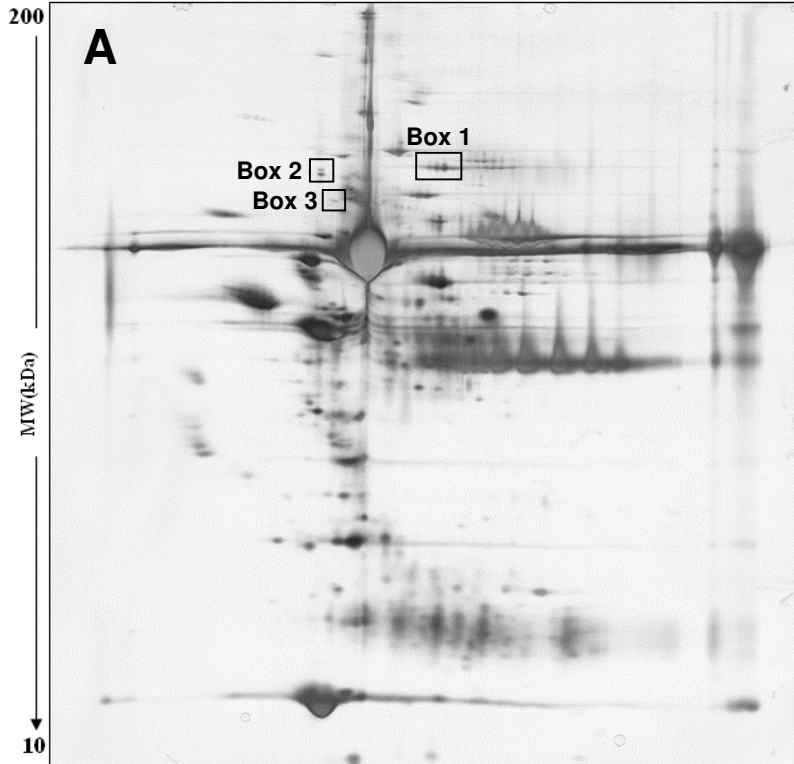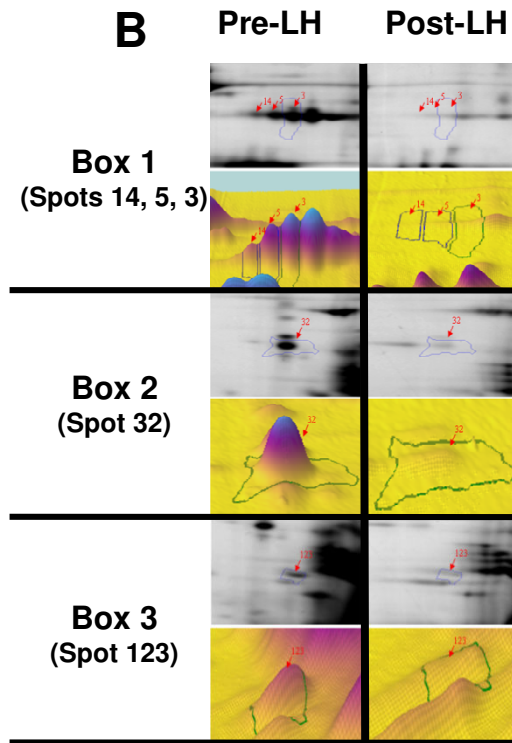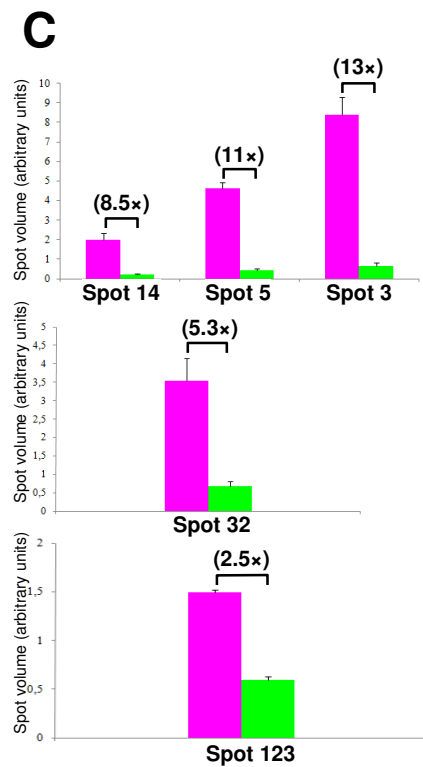

Supplement: MOESM7 [file 9568410]
